# Supplementary material for: Genetic diversity and population structure of Mongolian domestic Bactrian camels (Camelus bactrianus)
Source: PubMed Central journal article supplement — Anim Genet. 2014 Apr 21;45(4):550–8. doi: 10.1111/age.12158 (PMC4171754; doi:10.1111/age.12158), 2014-04-21

**Figure S1** BAYESIAN ANALYSIS OF POPULATION STRUCTURE (BAPS) of 83 mitochondrial sequences (803 bp). The best clustering solution of five (PP = 0.81) is shown.

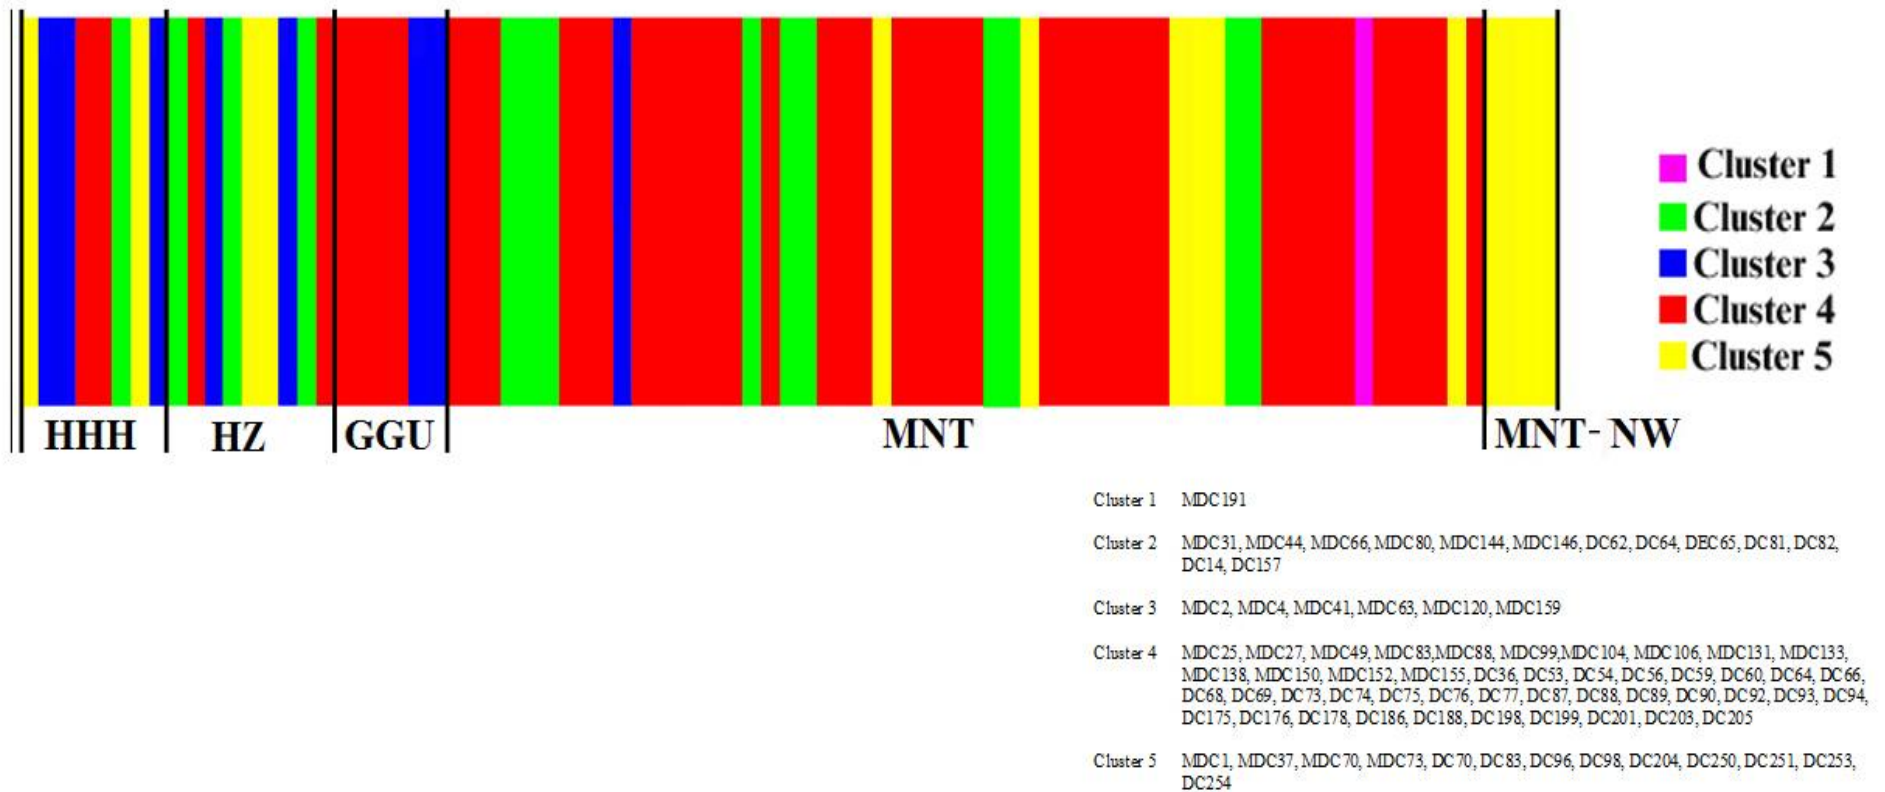

Supplement: age0045-0550-SD1.pdf [file age0045-0550-SD1.pdf]
