# Supplementary material for: Genetic diversity and population structure of Mongolian domestic Bactrian camels (Camelus bactrianus)
Source: PubMed Central journal article supplement — Anim Genet. 2014 Apr 21;45(4):550–8. doi: 10.1111/age.12158 (PMC4171754; doi:10.1111/age.12158), 2014-04-21

**Figure S3** Individual assignment probabilities of 150 Mongolian Bactrian camels to 2 – 6 theoretical genetic ancestry groups using STRUCTURE software. From K = 5 (best clustering solution; DeltaK; Fig. S2), northwestern Mongolian individuals (MNT-NW) are slightly differentiated from the other populations.

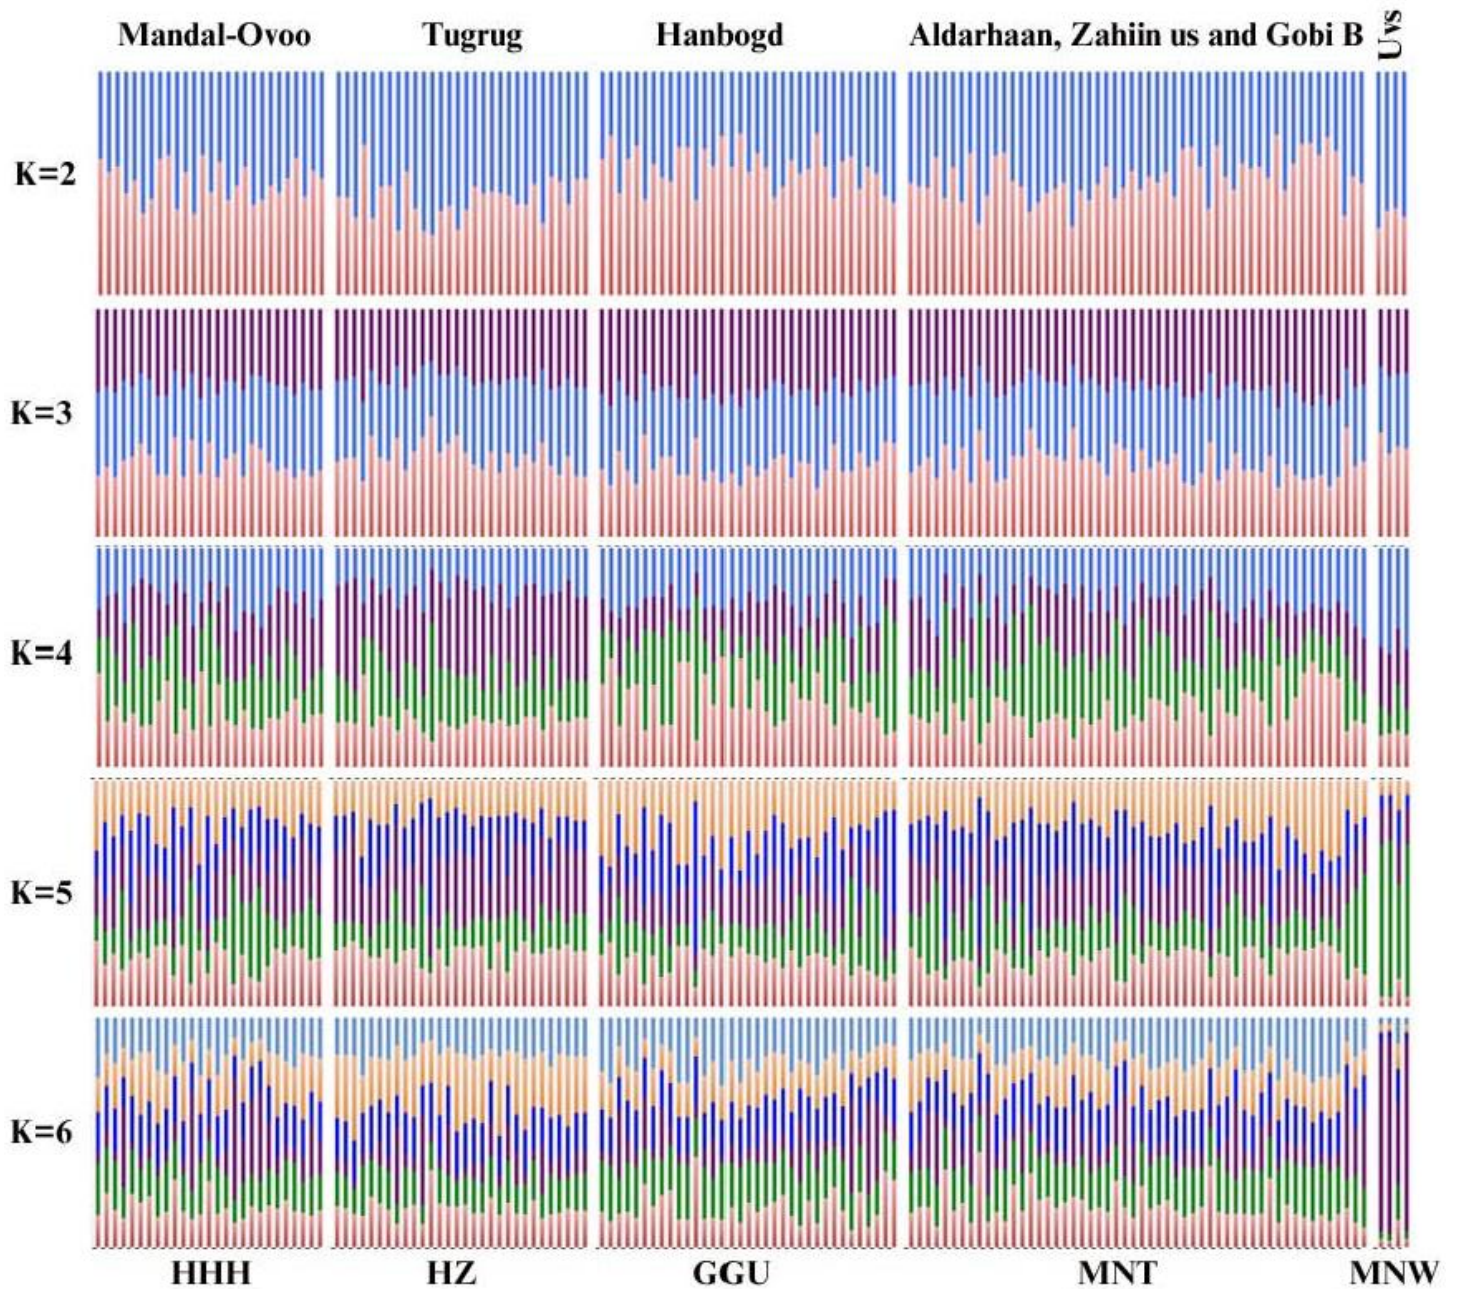

Supplement: age0045-0550-SD3.pdf [file age0045-0550-SD3.pdf]
