# Supplementary material for: Genetic diversity and population structure of Mongolian domestic Bactrian camels (Camelus bactrianus)
Source: PubMed Central journal article supplement — Anim Genet. 2014 Apr 21;45(4):550–8. doi: 10.1111/age.12158 (PMC4171754; doi:10.1111/age.12158), 2014-04-21
Supplement: age0045-0550-SD5.pdf [file age0045-0550-SD5.pdf]

Table S1. Details on the samples used in this study

| Lab # | Line | $\mu$ sat | mtDNA | index (r)<br>> 0.5 | Collection place                    | Type of samples |
|-------|------|-----------|-------|--------------------|-------------------------------------|-----------------|
| MDC1  | HHH  | x         | x     |                    | Mandal-Ovoo soum, Umnugobi province | Blood           |
| MDC2  | HHH  | x         | x     |                    | Mandal-Ovoo soum, Umnugobi province | Blood           |
| MDC3  | HHH  | x         |       | *                  | Mandal-Ovoo soum, Umnugobi province | Blood           |
| MDC4  | HHH  | x         | x     |                    | Mandal-Ovoo soum, Umnugobi province | Blood           |
| MDC5  | HHH  | x         | x     | *                  | Mandal-Ovoo soum, Umnugobi province | Blood           |
| MDC6  | HHH  | x         |       |                    | Mandal-Ovoo soum, Umnugobi province | Blood           |
| MDC7  | HHH  | x         | x     | *                  | Mandal-Ovoo soum, Umnugobi province | Blood           |
| MDC8  | HHH  | x         |       |                    | Mandal-Ovoo soum, Umnugobi province | Blood           |
| MDC9  | HHH  | x         |       | *                  | Mandal-Ovoo soum, Umnugobi province | Blood           |
| MDC10 | HHH  | x         |       | *                  | Mandal-Ovoo soum, Umnugobi province | Blood           |
| MDC11 | HHH  | x         | x     | *                  | Mandal-Ovoo soum, Umnugobi province | Blood           |
| MDC12 | HHH  | x         |       | *                  | Mandal-Ovoo soum, Umnugobi province | Blood           |
| MDC13 | HHH  | x         |       | *                  | Mandal-Ovoo soum, Umnugobi province | Blood           |
| MDC14 | HHH  | x         |       | *                  | Mandal-Ovoo soum, Umnugobi province | Blood           |
| MDC15 | HHH  | x         | x     | *                  | Mandal-Ovoo soum, Umnugobi province | Blood           |
| MDC16 | HHH  | x         |       |                    | Mandal-Ovoo soum, Umnugobi province | Blood           |
| MDC17 | HHH  | x         |       |                    | Mandal-Ovoo soum, Umnugobi province | Blood           |
| MDC18 | HHH  | x         |       |                    | Mandal-Ovoo soum, Umnugobi province | Blood           |
| MDC19 | HHH  | x         |       | *                  | Mandal-Ovoo soum, Umnugobi province | Blood           |
| MDC21 | HHH  | x         | x     | *                  | Mandal-Ovoo soum, Umnugobi province | Blood           |
| MDC23 | HHH  | x         |       |                    | Mandal-Ovoo soum, Umnugobi province | Blood           |
| MDC24 | HHH  | x         |       |                    | Mandal-Ovoo soum, Umnugobi province | Blood           |
| MDC25 | HHH  | x         | x     |                    | Mandal-Ovoo soum, Umnugobi province | Blood           |
| MDC26 | HHH  | x         |       |                    | Mandal-Ovoo soum, Umnugobi province | Blood           |
| MDC27 | HHH  | x         | x     |                    | Mandal-Ovoo soum, Umnugobi province | Blood           |
| MDC28 | HHH  | x         |       |                    | Mandal-Ovoo soum, Umnugobi province | Blood           |
| MDC29 | HHH  | x         |       |                    | Mandal-Ovoo soum, Umnugobi province | Blood           |

| Lab # | Line | $\mu$ sat | mtDNA | index (r)<br>> 0.5 | Collection place                    | Type of samples |
|-------|------|-----------|-------|--------------------|-------------------------------------|-----------------|
| MDC30 | HHH  | x         |       |                    | Mandal-Ovoo soum, Umnugobi province | Blood           |
| MDC31 | HHH  | x         | x     |                    | Mandal-Ovoo soum, Umnugobi province | Blood           |
| MDC32 | HHH  | x         | x     |                    | Mandal-Ovoo soum, Umnugobi province | Blood           |
| MDC33 | HHH  | x         |       |                    | Mandal-Ovoo soum, Umnugobi province | Blood           |
| MDC36 | HHH  | x         |       |                    | Mandal-Ovoo soum, Umnugobi province | Blood           |
| MDC37 | HHH  | x         |       |                    | Mandal-Ovoo soum, Umnugobi province | Blood           |
| MDC38 | HHH  | x         |       |                    | Mandal-Ovoo soum, Umnugobi province | Blood           |
| MDC39 | HHH  | x         |       |                    | Mandal-Ovoo soum, Umnugobi province | Blood           |
| MDC40 | HHH  | x         |       |                    | Mandal-Ovoo soum, Umnugobi province | Blood           |
| MDC41 | HHH  | x         | x     |                    | Mandal-Ovoo soum, Umnugobi province | Blood           |
| MDC42 | HHH  | x         |       |                    | Mandal-Ovoo soum, Umnugobi province | Blood           |
| MDC43 | HHH  | x         |       |                    | Mandal-Ovoo soum, Umnugobi province | Blood           |
| MDC44 | HZ   | x         | x     |                    | Tugrug soum, Gobi-Altai province    | Blood           |
| MDC45 | HZ   | x         |       | *                  | Tugrug soum, Gobi-Altai province    | Blood           |
| MDC46 | HZ   | x         |       | *                  | Tugrug soum, Gobi-Altai province    | Blood           |
| MDC47 | HZ   | x         |       |                    | Tugrug soum, Gobi-Altai province    | Blood           |
| MDC48 | HZ   | x         |       |                    | Tugrug soum, Gobi-Altai province    | Blood           |
| MDC49 | HZ   | x         | x     |                    | Tugrug soum, Gobi-Altai province    | Blood           |
| MDC50 | HZ   | x         |       |                    | Tugrug soum, Gobi-Altai province    | Blood           |
| MDC51 | HZ   | x         |       |                    | Tugrug soum, Gobi-Altai province    | Blood           |
| MDC52 | HZ   | x         |       |                    | Tugrug soum, Gobi-Altai province    | Blood           |
| MDC53 | HZ   | x         | x     | *                  | Tugrug soum, Gobi-Altai province    | Blood           |
| MDC54 | HZ   | x         |       |                    | Tugrug soum, Gobi-Altai province    | Blood           |
| MDC55 | HZ   | x         | x     | *                  | Tugrug soum, Gobi-Altai province    | Blood           |
| MDC56 | HZ   | x         |       | *                  | Tugrug soum, Gobi-Altai province    | Blood           |
| MDC57 | HZ   | x         |       | *                  | Tugrug soum, Gobi-Altai province    | Blood           |
| MDC59 | HZ   | x         |       |                    | Tugrug soum, Gobi-Altai province    | Blood           |
| MDC60 | HZ   | x         |       |                    | Tugrug soum, Gobi-Altai province    | Blood           |
| MDC61 | HZ   | x         |       | *                  | Tugrug soum, Gobi-Altai province    | Blood           |

| Lab # | Line | $\mu$ sat | mtDNA | index (r)<br>> 0.5 | Collection place                 | Type of samples |
|-------|------|-----------|-------|--------------------|----------------------------------|-----------------|
| MDC62 | HZ   | x         |       | *                  | Tugrug soum, Gobi-Altai province | Blood           |
| MDC63 | HZ   | x         | x     |                    | Tugrug soum, Gobi-Altai province | Blood           |
| MDC64 | HZ   | x         |       |                    | Tugrug soum, Gobi-Altai province | Blood           |
| MDC65 | HZ   | x         |       |                    | Tugrug soum, Gobi-Altai province | Blood           |
| MDC66 | HZ   | x         | x     |                    | Tugrug soum, Gobi-Altai province | Blood           |
| MDC67 | HZ   | x         |       |                    | Tugrug soum, Gobi-Altai province | Blood           |
| MDC68 | HZ   | x         |       | *                  | Tugrug soum, Gobi-Altai province | Blood           |
| MDC69 | HZ   | x         |       | *                  | Tugrug soum, Gobi-Altai province | Blood           |
| MDC70 | HZ   | x         | x     |                    | Tugrug soum, Gobi-Altai province | Blood           |
| MDC71 | HZ   | x         |       | *                  | Tugrug soum, Gobi-Altai province | Blood           |
| MDC72 | HZ   | x         |       |                    | Tugrug soum, Gobi-Altai province | Blood           |
| MDC73 | HZ   | x         | x     |                    | Tugrug soum, Gobi-Altai province | Blood           |
| MDC74 | HZ   | x         |       |                    | Tugrug soum, Gobi-Altai province | Blood           |
| MDC75 | HZ   | x         |       |                    | Tugrug soum, Gobi-Altai province | Blood           |
| MDC76 | HZ   | x         |       |                    | Tugrug soum, Gobi-Altai province | Blood           |
| MDC77 | HZ   | x         | x     |                    | Tugrug soum, Gobi-Altai province | Blood           |
| MDC78 | HZ   | x         |       |                    | Tugrug soum, Gobi-Altai province | Blood           |
| MDC79 | HZ   | x         |       | *                  | Tugrug soum, Gobi-Altai province | Blood           |
| MDC80 | HZ   | x         | x     |                    | Tugrug soum, Gobi-Altai province | Blood           |
| MDC81 | HZ   | x         |       |                    | Tugrug soum, Gobi-Altai province | Blood           |
| MDC82 | HZ   | x         |       |                    | Tugrug soum, Gobi-Altai province | Blood           |
| MDC83 | HZ   | x         | x     |                    | Tugrug soum, Gobi-Altai province | Blood           |
| MDC84 | HZ   | x         |       |                    | Tugrug soum, Gobi-Altai province | Blood           |
| MDC85 | HZ   | x         |       | *                  | Tugrug soum, Gobi-Altai province | Blood           |
| MDC86 | HZ   | x         |       |                    | Tugrug soum, Gobi-Altai province | Blood           |
| MDC87 | HZ   | x         |       |                    | Tugrug soum, Gobi-Altai province | Blood           |
| MDC88 | GGU  | x         | x     |                    | Hanbogd soum, Umnugobi province  | Blood           |
| MDC89 | GGU  | x         |       |                    | Hanbogd soum, Umnugobi province  | Blood           |
| MDC90 | GGU  | x         |       |                    | Hanbogd soum, Umnugobi province  | Blood           |

| Lab #  | Line | $\mu$ sat | mtDNA | index (r)<br>> 0.5 | Collection place                | Type of samples |
|--------|------|-----------|-------|--------------------|---------------------------------|-----------------|
| MDC91  | GGU  | x         |       |                    | Hanbogd soum, Umnugobi province | Blood           |
| MDC92  | GGU  | x         |       | *                  | Hanbogd soum, Umnugobi province | Blood           |
| MDC93  | GGU  | x         |       |                    | Hanbogd soum, Umnugobi province | Blood           |
| MDC94  | GGU  | x         |       |                    | Hanbogd soum, Umnugobi province | Blood           |
| MDC95  | GGU  | x         |       |                    | Hanbogd soum, Umnugobi province | Blood           |
| MDC96  | GGU  | x         | x     | *                  | Hanbogd soum, Umnugobi province | Blood           |
| MDC97  | GGU  | x         |       |                    | Hanbogd soum, Umnugobi province | Blood           |
| MDC98  | GGU  | x         |       |                    | Hanbogd soum, Umnugobi province | Blood           |
| MDC99  | GGU  | x         | x     |                    | Hanbogd soum, Umnugobi province | Blood           |
| MDC100 | GGU  | x         |       |                    | Hanbogd soum, Umnugobi province | Blood           |
| MDC101 | GGU  | x         |       | *                  | Hanbogd soum, Umnugobi province | Blood           |
| MDC102 | GGU  | x         |       |                    | Hanbogd soum, Umnugobi province | Blood           |
| MDC104 | GGU  | x         | x     |                    | Hanbogd soum, Umnugobi province | Blood           |
| MDC105 | GGU  | x         |       | *                  | Hanbogd soum, Umnugobi province | Blood           |
| MDC106 | GGU  | x         | x     |                    | Hanbogd soum, Umnugobi province | Blood           |
| MDC107 | GGU  | x         |       |                    | Hanbogd soum, Umnugobi province | Blood           |
| MDC108 | GGU  | x         |       |                    | Hanbogd soum, Umnugobi province | Blood           |
| MDC109 | GGU  | x         |       |                    | Hanbogd soum, Umnugobi province | Blood           |
| MDC110 | GGU  | x         |       |                    | Hanbogd soum, Umnugobi province | Blood           |
| MDC111 | GGU  | x         |       |                    | Hanbogd soum, Umnugobi province | Blood           |
| MDC112 | GGU  | x         |       |                    | Hanbogd soum, Umnugobi province | Blood           |
| MDC113 | GGU  | x         |       |                    | Hanbogd soum, Umnugobi province | Blood           |
| MDC114 | GGU  | x         |       |                    | Hanbogd soum, Umnugobi province | Blood           |
| MDC115 | GGU  | x         | x     |                    | Hanbogd soum, Umnugobi province | Blood           |
| MDC117 | GGU  | x         |       |                    | Hanbogd soum, Umnugobi province | Blood           |
| MDC118 | GGU  | x         |       |                    | Hanbogd soum, Umnugobi province | Blood           |
| MDC119 | GGU  | x         |       |                    | Hanbogd soum, Umnugobi province | Blood           |
| MDC120 | GGU  | x         | x     |                    | Hanbogd soum, Umnugobi province | Blood           |
| MDC122 | GGU  | x         |       |                    | Hanbogd soum, Umnugobi province | Blood           |

| Lab #  | Line | $\mu$ sat | mtDNA | index (r)<br>> 0.5 | Collection place                 | Type of samples |
|--------|------|-----------|-------|--------------------|----------------------------------|-----------------|
| MDC124 | GGU  | x         |       |                    | Hanbogd soum, Umnugobi province  | Blood           |
| MDC125 | GGU  | x         |       |                    | Hanbogd soum, Umnugobi province  | Blood           |
| MDC126 | GGU  | x         |       |                    | Hanbogd soum, Umnugobi province  | Blood           |
| MDC127 | GGU  | x         |       |                    | Hanbogd soum, Umnugobi province  | Blood           |
| MDC128 | GGU  | x         |       |                    | Hanbogd soum, Umnugobi province  | Blood           |
| MDC129 | GGU  | x         |       |                    | Hanbogd soum, Umnugobi province  | Blood           |
| MDC130 | GGU  | x         |       |                    | Hanbogd soum, Umnugobi province  | Blood           |
| MDC131 | MNT  | x         | x     |                    | Aldarkhaan soum, Zavhan province | Blood           |
| MDC132 | MNT  | x         |       | *                  | Aldarkhaan soum, Zavhan province | Blood           |
| MDC133 | MNT  | x         | x     |                    | Aldarkhaan soum, Zavhan province | Blood           |
| MDC134 | MNT  | x         |       |                    | Aldarkhaan soum, Zavhan province | Blood           |
| MDC135 | MNT  | x         |       | *                  | Aldarkhaan soum, Zavhan province | Blood           |
| MDC137 | MNT  | x         |       |                    | Aldarkhaan soum, Zavhan province | Blood           |
| MDC138 | MNT  | x         | x     |                    | Aldarkhaan soum, Zavhan province | Blood           |
| MDC139 | MNT  | x         |       |                    | Aldarkhaan soum, Zavhan province | Blood           |
| MDC140 | MNT  | x         | x     | *                  | Aldarkhaan soum, Zavhan province | Blood           |
| MDC141 | MNT  | x         |       |                    | Aldarkhaan soum, Zavhan province | Blood           |
| MDC142 | MNT  | x         | x     | *                  | Aldarkhaan soum, Zavhan province | Blood           |
| MDC143 | MNT  | x         |       |                    | Aldarkhaan soum, Zavhan province | Blood           |
| MDC144 | MNT  | x         | x     |                    | Aldarkhaan soum, Zavhan province | Blood           |
| MDC145 | MNT  | x         |       | *                  | Aldarkhaan soum, Zavhan province | Blood           |
| MDC146 | MNT  | x         | x     |                    | Aldarkhaan soum, Zavhan province | Blood           |
| MDC147 | MNT  | x         |       |                    | Aldarkhaan soum, Zavhan province | Blood           |
| MDC148 | MNT  | x         |       |                    | Aldarkhaan soum, Zavhan province | Blood           |
| MDC149 | MNT  | x         | x     |                    | Aldarkhaan soum, Zavhan province | Blood           |
| MDC150 | MNT  | x         | x     |                    | Aldarkhaan soum, Zavhan province | Blood           |
| MDC152 | MNT  | x         | x     |                    | Aldarkhaan soum, Zavhan province | Blood           |
| MDC153 | MNT  | x         |       |                    | Aldarkhaan soum, Zavhan province | Blood           |
| MDC154 | MNT  | x         |       |                    | Aldarkhaan soum, Zavhan province | Blood           |

| Lab #  | Line | $\mu$ sat | mtDNA | index (r)<br>> 0.5 | Collection place                           | Type of samples |
|--------|------|-----------|-------|--------------------|--------------------------------------------|-----------------|
| MDC155 | MNT  | x         | x     |                    | Aldarkhaan soum, Zavhan province           | Blood           |
| MDC156 | MNT  | x         |       |                    | Aldarkhaan soum, Zavhan province           | Blood           |
| MDC157 | MNT  | x         |       |                    | Aldarkhaan soum, Zavhan province           | Blood           |
| MDC159 | MNT  | x         | x     |                    | Aldarkhaan soum, Zavhan province           | Blood           |
| DC36   | MNT  | x         | x     |                    | Zahiin us, Tsogt soum, Gobi-Altai province | hair            |
| DC53   | MNT  | x         | x     |                    | Zahiin us, Tsogt soum, Gobi-Altai province | hair            |
| DC54   | MNT  | x         | x     |                    | Zahiin us, Tsogt soum, Gobi-Altai province | hair            |
| DC56   | MNT  | x         | x     |                    | Zahiin us, Tsogt soum, Gobi-Altai province | hair            |
| DC57   | MNT  | x         | x     | *                  | Zahiin us, Tsogt soum, Gobi-Altai province | hair            |
| DC58   | MNT  | x         | x     | *                  | Zahiin us, Tsogt soum, Gobi-Altai province | hair            |
| DC59   | MNT  | x         | x     |                    | Zahiin us, Tsogt soum, Gobi-Altai province | hair            |
| DC60   | MNT  | x         | x     |                    | Zahiin us, Tsogt soum, Gobi-Altai province | hair            |
| DC61   | MNT  | x         | x     | *                  | Zahiin us, Tsogt soum, Gobi-Altai province | hair            |
| DC62   | MNT  | x         | x     |                    | Zahiin us, Tsogt soum, Gobi-Altai province | hair            |
| DC63   | MNT  | x         | x     |                    | Zahiin us, Tsogt soum, Gobi-Altai province | hair            |
| DC64   | MNT  | x         | x     |                    | Zahiin us, Tsogt soum, Gobi-Altai province | hair            |
| DC65   | MNT  | x         | x     |                    | Zahiin us, Tsogt soum, Gobi-Altai province | hair            |
| DC66   | MNT  | x         | x     |                    | Zahiin us, Tsogt soum, Gobi-Altai province | hair            |
| DC67   | MNT  | x         | x     | *                  | Zahiin us, Tsogt soum, Gobi-Altai province | hair            |
| DC68   | MNT  | x         | x     |                    | Zahiin us, Tsogt soum, Gobi-Altai province | hair            |
| DC69   | MNT  | x         | x     |                    | Zahiin us, Tsogt soum, Gobi-Altai province | hair            |
| DC70   | MNT  | x         | x     |                    | Zahiin us, Tsogt soum, Gobi-Altai province | hair            |
| DC71   | MNT  | x         | x     | *                  | Zahiin us, Tsogt soum, Gobi-Altai province | hair            |
| DC72   | MNT  | x         | x     | *                  | Zahiin us, Tsogt soum, Gobi-Altai province | hair            |
| DC73   | MNT  | x         | x     |                    | Zahiin us, Tsogt soum, Gobi-Altai province | hair            |
| DC74   | MNT  | x         | x     |                    | Zahiin us, Tsogt soum, Gobi-Altai province | hair            |
| DC75   | MNT  | x         | x     |                    | Zahiin us, Tsogt soum, Gobi-Altai province | hair            |
| DC76   | MNT  | x         | x     |                    | Zahiin us, Tsogt soum, Gobi-Altai province | hair            |
| DC77   | MNT  | x         | x     |                    | Zahiin us, Tsogt soum, Gobi-Altai province | hair            |

| Lab # | Line | $\mu$ sat | mtDNA | index (r)<br>> 0.5 | Collection place                           | Type of samples |
|-------|------|-----------|-------|--------------------|--------------------------------------------|-----------------|
| DC80  | MNT  | x         | x     | *                  | Zahiin us, Tsogt soum, Gobi-Altai province | hair            |
| DC81  | MNT  | x         | x     |                    | Zahiin us, Tsogt soum, Gobi-Altai province | hair            |
| DC82  | MNT  | x         | x     |                    | Zahiin us, Tsogt soum, Gobi-Altai province | hair            |
| DC83  | MNT  | x         | x     |                    | Zahiin us, Tsogt soum, Gobi-Altai province | hair            |
| DC84  | MNT  | x         | x     | *                  | Zahiin us, Tsogt soum, Gobi-Altai province | hair            |
| DC87  | MNT  | x         | x     |                    | Zahiin us, Tsogt soum, Gobi-Altai province | hair            |
| DC88  | MNT  | x         | x     |                    | Zahiin us, Tsogt soum, Gobi-Altai province | hair            |
| DC90  | MNT  | x         | x     |                    | Zahiin us, Tsogt soum, Gobi-Altai province | hair            |
| DC92  | MNT  | x         | x     |                    | Zahiin us, Tsogt soum, Gobi-Altai province | hair            |
| DC93  | MNT  | x         | x     |                    | Zahiin us, Tsogt soum, Gobi-Altai province | hair            |
| DC94  | MNT  | x         | x     |                    | Zahiin us, Tsogt soum, Gobi-Altai province | hair            |
| DC95  | MNT  | x         | x     | *                  | Zahiin us, Tsogt soum, Gobi-Altai province | hair            |
| DC96  | MNT  | x         | x     |                    | Zahiin us, Tsogt soum, Gobi-Altai province | hair            |
| DC98  | MNT  | x         | x     |                    | Zahiin us, Tsogt soum, Gobi-Altai province | hair            |
| DC137 | MNT  |           | x     |                    | Gobi "B", Bugat soum, Gobi-Altai province  | hair            |
| DC145 | MNT  |           | x     |                    | Gobi "B", Bugat soum, Gobi-Altai province  | hair            |
| DC157 | MNT  | x         | x     |                    | Gobi "B", Bugat soum, Gobi-Altai province  | hair            |
| DC175 | MNT  |           | x     |                    | Gobi "B", Bugat soum, Gobi-Altai province  | hair            |
| DC176 | MNT  |           | x     |                    | Gobi "B", Bugat soum, Gobi-Altai province  | hair            |
| DC178 | MNT  |           | x     |                    | Gobi "B", Bugat soum, Gobi-Altai province  | hair            |
| DC180 | MNT  |           | x     |                    | Gobi "B", Bugat soum, Gobi-Altai province  | hair            |
| DC186 | MNT  | x         | x     |                    | Gobi "B", Bugat soum, Gobi-Altai province  | hair            |
| DC188 | MNT  |           | x     |                    | Gobi "B", Bugat soum, Gobi-Altai province  | hair            |
| DC191 | MNT  |           | x     |                    | Gobi "B", Bugat soum, Gobi-Altai province  | hair            |
| DC198 | MNT  | x         | x     |                    | Gobi "B", Bugat soum, Gobi-Altai province  | hair            |
| DC199 | MNT  |           | x     |                    | Gobi "B", Bugat soum, Gobi-Altai province  | hair            |
| DC201 | MNT  |           | x     |                    | Gobi "B", Bugat soum, Gobi-Altai province  | hair            |
| DC203 | MNT  |           | x     |                    | Gobi "B", Bugat soum, Gobi-Altai province  | hair            |
| DC204 | MNT  |           | x     |                    | Gobi "B", Bugat soum, Gobi-Altai province  | hair            |

| Lab # | Line   | $\mu$ sat | mtDNA | index (r)<br>> 0.5 | Collection place                          | Type of samples |
|-------|--------|-----------|-------|--------------------|-------------------------------------------|-----------------|
| DC205 | MNT    |           | x     |                    | Gobi “B”, Bugat soum, Gobi-Altai province | hair            |
| DC250 | MNT-NW | x         | x     |                    | Baruunturuun soum, Uvs province           | hair            |
| DC251 | MNT-NW | x         | x     |                    | Baruunturuun soum, Uvs province           | hair            |
| DC253 | MNT-NW | x         | x     |                    | Baruunturuun soum, Uvs province           | hair            |
| DC254 | MNT-NW | x         | x     |                    | Baruunturuun soum, Uvs province           | hair            |
| Total |        | 193       | 102   | 43                 |                                           |                 |

GGU = Galbiin Gobiin Ulaan; HHH = Haniin Hetsiin Huren; HZ = Hos Zogdort; MNT = Mongolian native camels (Aldarkhaan, Zahiin us, Gobi “B”); MNT-NW = Western Mongolian native camels; x = complete profile available for the 17 microsatellite markers ( $\mu$ sat) and/ or the 803-bp mitochondrial segment (mtDNA); \* = individuals with a relatedness index (r) above 0.5, which were removed from subsequent analyses. Relatedness indexes were inferred in COANCESTRY software.
