# Supplementary material for: Genetic diversity and population structure of Mongolian domestic Bactrian camels (Camelus bactrianus)
Source: PubMed Central journal article supplement — Anim Genet. 2014 Apr 21;45(4):550–8. doi: 10.1111/age.12158 (PMC4171754; doi:10.1111/age.12158), 2014-04-21
Supplement: age0045-0550-SD6.pdf [file age0045-0550-SD6.pdf]

Table S2. Seventeen microsatellite markers applied in the Bactrian camel (*Camelus bactrianus*)

| Name   | Publication                       | Dye | Primers                                                    | Plex | Length  | Temp |
|--------|-----------------------------------|-----|------------------------------------------------------------|------|---------|------|
| KS01   | Silbermayr <i>et al.</i> , 2010   | HEX | f:TGGCATTTCCTGCAACTGA<br>r:AGGAAAGGGCTGAATTGCTC            | MP3  | 125-157 | 58   |
| KS02   | Silbermayr <i>et al.</i> , 2010   | HEX | f:TCTCTGCACCACCAGTATTCC<br>r:TCAGATATGGGGAGCCTTACA         | MP2  | 155-197 | 58   |
| KS04   | Silbermayr <i>et al.</i> , 2010   | TET | f:AGGGTCAGGTTTCCTCCAAT<br>r:GGGTTTGCACCATCTCAGTT           | MP1  | 240-246 | 58   |
| KS05   | Silbermayr <i>et al.</i> , 2010   | HEX | f:GGTCCTAGGAGAGAGGAAAAAGA<br>r:GGACTAAGGAACCCCAAAGG        | MP3  | 229-241 | 58   |
| KS06   | Silbermayr <i>et al.</i> , 2010   | FAM | f:GGCATTATGATTAGTGGGGTAAGTA<br>r:GAACCCCAAAGGAAGATGCT      | MP1  | 182-192 | 58   |
| KS07   | Silbermayr <i>et al.</i> , 2010   | HEX | f:TCTGCTCTGTATGAGTTTATGCCTG<br>r:GCGCCAATCCACTTATTTATG     | MP3  | 91-127  | 58   |
| KS08   | Silbermayr <i>et al.</i> , 2010   | TET | f:ATTCAGCCCCATTCTTTCCT<br>r: TTCCTACCCTCCACATGGTC          | MP1  | 127-153 | 58   |
| KS09   | Silbermayr <i>et al.</i> , 2010   | FAM | f:CTGCCCACTTTTCAATTGGT<br>r:AAACAGTGCACAGCAAAGGA           | MP2  | 198-223 | 58   |
| VOLP08 | GI:10719682                       | FAM | f:CCATTCACCCCATCTCTC<br>r:TCGCCAGTGACCTTATTTAGA            | MP5  | 148-178 | 58   |
| VOLP10 | GI:10719683                       | FAM | f:CTTTCTCCTTTCCTCCCTACT<br>r:CGTCCACTTCCTTCATTTTC          | MP5  | 238-268 | 58   |
| VOLP32 | GI:10719686                       | FAM | f:GTGATCGGAATGGCTTGAAA<br>r:CAGCGAGCACCTGAAAGAA            | MP7  | 254-168 | 56   |
| VOLP59 | GI:10719688                       | HEX | f:CCTTCCTCAGAATCCGCCACC<br>r:CCCGCGCACCAAGCAG              | MP5  | 101-119 | 58   |
| YWLL29 | Lang <i>et al.</i> , 1996         | TET | f:GAAGGCAGGAGAAAAGGTAG<br>r:CAGAGGCTTAATAACTTGCAG          | MP7  | 206-226 | 56   |
| YWLL36 | Lang <i>et al.</i> , 1996         | FAM | f:AGTCTTGGTGTGGTGGTAGAA<br>r:TGCCAGGATACTGACAGTGAT         | MP6  | 141-179 | 58   |
| YWLL38 | Lang <i>et al.</i> , 1996         | TET | f:GGCCTAAATCCTACTAGAC<br>r: CCTCTCACTCTTGTTCTCCTC          | MP5  | 176-196 | 58   |
| CVRL07 | Mariasegaram <i>et al.</i> , 2002 | HEX | f:AATACCCTAGTTGAAGCTCTGTCCT<br>r:GAGTGCCTTTATAAATATGGGTCTG | MP6  | 272-306 | 55   |
| LCA65  | Penedo <i>et al.</i> , 1998       | FAM | f:TTTTTCCCCTGTGGTTGAAT<br>r:AACTCAGCTGTTGTCAGGGG           | MP7  | 171-191 | 56   |
