# Supplementary material for: Genetic diversity and population structure of Mongolian domestic Bactrian camels (Camelus bactrianus)
Source: PubMed Central journal article supplement — Anim Genet. 2014 Apr 21;45(4):550–8. doi: 10.1111/age.12158 (PMC4171754; doi:10.1111/age.12158), 2014-04-21
Supplement: age0045-0550-SD7.pdf [file age0045-0550-SD7.pdf]

Table S3. Inbreeding coefficients  $F_{IS}$  per microsatellite locus.

| Locus        | HHH          | HZ            | GGU          | MNT          | MNT-NW       |
|--------------|--------------|---------------|--------------|--------------|--------------|
| KS05         | -0.114       | 0.124         | 0.171        | -0.054       | 0.000        |
| KS07         | -0.578       | -0.306        | -0.515       | -0.754       | -0.600       |
| KS08         | -0.025       | -0.219        | -0.141       | 0.118        | 0.000        |
| KS02         | 0.089        | -0.032        | -0.001       | -0.034       | -0.333       |
| KS09         | -0.166       | -0.123        | -0.078       | 0.165        | 0.250        |
| KS01         | -0.134       | 0.064         | 0.148        | 0.236        | -            |
| KS04         | 0.128        | -0.119        | -0.219       | -0.036       | 0.143        |
| KS06         | -0.156       | 0.196         | -0.099       | 0.025        | 0.000        |
| VOLP08       | 0.360        | -0.091        | 0.116        | 0.059        | -            |
| VOLP10       | 0.113        | 0.188         | 0.080        | 0.052        | 1.000        |
| VOLP59       | 0.000        | 0.000         | 0.000        | 1.000        | -            |
| YWLL38       | 0.137        | -0.870        | 0.192        | 0.158        | 1.000        |
| CVRL07       | -0.009       | -0.318        | 0.021        | 0.127        | -            |
| YWLL36       | 0.100        | -0.008        | 0.018        | -0.035       | 0.143        |
| LCA65        | 0.177        | 0.066         | 0.134        | 0.325        | 0.000        |
| VOLP32       | 0.083        | 0.120         | 0.334        | -0.178       | 1.000        |
| YWLL29       | 0.201        | 0.026         | 0.121        | -0.081       | 0.000        |
| <b>Total</b> | <b>0.015</b> | <b>-0.028</b> | <b>0.024</b> | <b>0.037</b> | <b>0.018</b> |

GGU = Galbiin Gobiin Ulaan; HHH = Haniin Hetsiin Huren;  
 HZ = Hos Zogdort; MNT = Mongolian native camels  
 (Aldarkhaan, Zahiin us, Gobi “B”); MNT-NW = Western  
 Mongolian native camels
