# Supplementary figures and images for: Genetic diversity and population structure of Mongolian domestic Bactrian camels (Camelus bactrianus)
Source: PubMed Central journal article supplement — Anim Genet. 2014 Apr 21;45(4):550–8. doi: 10.1111/age.12158 (PMC4171754; doi:10.1111/age.12158), 2014-04-21

**Figure S2** Distribution Delta K of Mongolian domestic camel

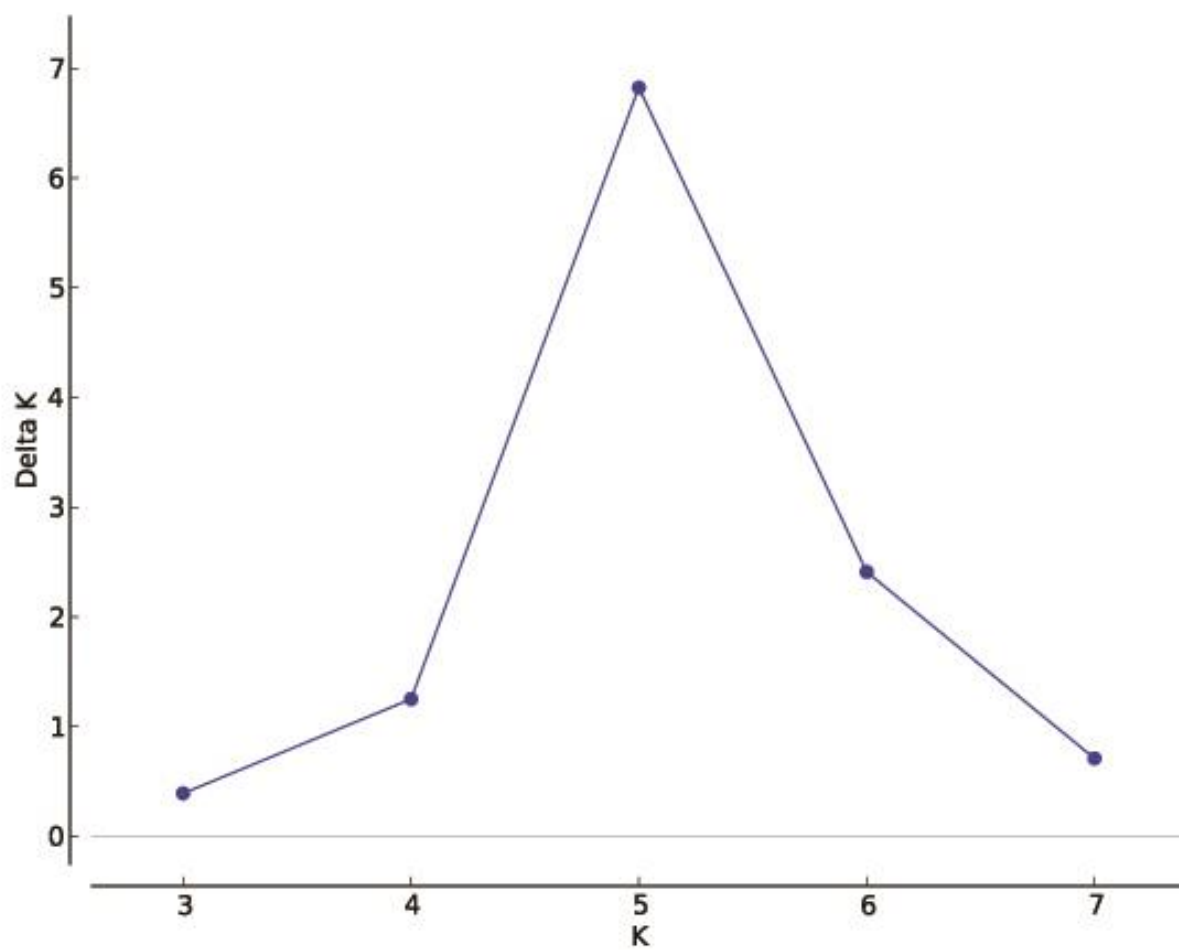

Supplement: age0045-0550-SD2.pdf [file age0045-0550-SD2.pdf]
